# Supplementary material for: Genome Analysis and Therapeutic Evaluation of a Novel Lytic Bacteriophage of Salmonella Typhimurium: Suggestive of a New Genus in the Subfamily Vequintavirinae
Source: MDPI journal article supplement (doi:10.3390/v14020241), 2022-01-25
Supplement: s1 [file s1]

**Table S1.** Oligonucleotides used in *Salmonella* Typhimurium strain SE-BS17 Characterization.

| Primer code                      | Target Gene        | Oligonucleotide Sequence (5'-3')                                                 | Size (bp)      |
|----------------------------------|--------------------|----------------------------------------------------------------------------------|----------------|
| <i>Salmonella</i> identification | <i>invA</i>        | F' TCATCGCACCGTCAAAGGAACC<br>R' GTGAAATTATCGCCACGTTCGG<br>GGCAA                  | 284            |
|                                  | <i>iroB</i>        | F' TCGGTATTCTGTTTGTCTGGTCC<br>R' TACGTTCCCACCATTCTTCCC                           | 606            |
|                                  | <i>fliC</i>        | F' TATGCCGCTACATATGATGAG<br>R' TTAACGCAGTAAAGAGAG                                | 495            |
| 16S rRNA                         | PCR primers        | 27F 5' AGA GTT TGA TCM TGG CTC AG 3<br>1492R 5' TAC GGY TAC CTT GTT ACG ACT T 3' | Macrogen Korea |
|                                  | Sequencing Primers | 785F 5' GGA TTA GAT ACC CTG GTA 3'<br>907R 5' CCG TCA ATT CMT TTR AGT TT 3'      |                |
| Trimethoprim resistance gene     | <i>dhfrA1</i>      | F' GTGAAACTATCACTAATGG<br>R' TTAACCCTTTTGCCAGATTT                                | 474bp          |
| Beta-Lactams                     | <i>blaCTX-M</i>    | F' CGCTGTTGTAGGAAGTGTG<br>R' GGCTGGGTGAAGTAAGTGAC                                | 754            |
|                                  | <i>blaTEM-1</i>    | F' CAGCGGTAAGATCCTTGAGA<br>R' ACTCCCCGTCGTGTAGATAA                               | 643            |

**Table S2.** SSBI34 ORFs having BLAST P homology with known protein in NCBI data base.

| Serial no | Position (bp) | Genome ORF | Map region | Total AA | Putative Function                                      | Query coverage (BLAST P) | Similarity (BLAST P) | GB Ac. NO      | Organism                    |
|-----------|---------------|------------|------------|----------|--------------------------------------------------------|--------------------------|----------------------|----------------|-----------------------------|
| 1         | 1809-2141     | 5          | I          | 110AA    | Putative methanogen marker protein 2                   | 98%                      | 48.18%               | CAD5242204.1   | Klebsiella phage JD18       |
| 2         | 6123-6713     | 17         | I          | 196AA    | Putative serine tRNA ligase                            | 91%                      | 46.70 %              | QUL77179.1     | Escherichia phage UPEC06    |
| 3         | 7243-8358     | 19         | I          | 371AA    | Putative nucleotidyltransferase                        | 98%                      | 66.03%               | YP_009015173.1 | Cronobacter phage CR9       |
| 4         | 9986-11305    | 24         | I          | 439AA    | Putative tRNA nucleotidyltransferase                   | 98%                      | 67.97%               | YP_009188904.1 | Cronobacter phage PBES 02   |
| 5         | 12167-12682   | 28         | I          | 171AA    | phage N-6-adenine-methyltransferase                    | 98%                      | 83.43%               | QQG33511.1     | Pectobacterium phage PcCB7V |
| 6         | 12682-14028   | 29         | I          | 448AA    | ATP-dependent Clp endopeptidase, proteolytic subunit   | 98%                      | 81.76%               | YP_006383219.1 | Cronobacter phage CR3       |
| 7         | 15673-15951   | 34         | I          | 92AA     | glutaredoxin 3, grxC                                   | 55%                      | 45.68%               | YP_007392603.1 | Pectobacterium phage phiTE  |
| 8         | 16506-17603   | 37         | I          | 365AA    | glutaredoxin 3, grxC                                   | 97%                      | 52.69%               | YP_006383227.1 | Cronobacter phage CR3       |
| 9         | 17725-19989   | 38         | I          | 754AA    | ribonucleoside-diphosphate reductase, class 1b, (nrdF) | 99%                      | 76.16%               | QUL77203.1     | Escherichia phage UPEC06    |
| 10        | 20828-21844   | 41         | I          | 338AA    | ribonucleoside-diphosphate reductase, alpha subunit    | 99%                      | 74.63%               | YP_009042457.1 | Cronobacter phage CR8       |
|           |               |            |            |          | thymidylate synthase, flavin-dependent, thyX_41        | 99%                      | 85.25%               | YP_009188923.1 | Cronobacter phage CR8       |
|           |               |            |            |          |                                                        | 99%                      | 85.25%               | YP_009188923.1 | Cronobacter phage PBES 02   |

|    |             |    |   |       |                                                                                                       |     |        |                |                                  |
|----|-------------|----|---|-------|-------------------------------------------------------------------------------------------------------|-----|--------|----------------|----------------------------------|
| 11 | 22863-23510 | 44 | I | 215AA | ribulose-phosphate 3-epimerase, rpe_44                                                                | 97% | 65.71% | YP_009015200   | Cronobacter phage CR9            |
| 12 | 23598-24644 | 45 | I | 348AA | DNA polymerase III, epsilon sub unit, dnaQ_45                                                         | 99% | 78.61% | YP_009188928.1 | Cronobacter phage PBES 02        |
|    |             |    |   |       |                                                                                                       |     |        | YP_009042465.1 | Cronobacter phage CR8            |
| 13 | 24881-25441 | 47 | I | 186AA | Endo VII packaging and recombination endonuclease (present in T4 phages only lytic cycle no lysogeny) | 95% | 62.22% | YP_007392629.1 | Pectobacterium phage phiTE       |
| 14 | 26878-27987 | 51 | I | 369AA | Putative exodeoxyribonuclease                                                                         | 99% | 79.08% | QUL77220.1     | Escherichia phage UPEC06         |
| 15 | 28335-28835 | 52 | I | 166AA | putative HNH endonuclease                                                                             | 99% | 81.93% | YP_009042472.1 | Cronobacter phage CR8            |
|    |             |    |   |       |                                                                                                       |     | 81.33% | YP_006383246.1 | Cronobacter phage CR3            |
| 16 | 29635-30009 | 55 | I | 124AA | hypothetical protein CR9_253                                                                          | 96% | 73.55% | YP_009015215.1 | Cronobacter phage CR9            |
|    |             |    |   |       | Putative anti restriction endonuclease                                                                | 98% | 68.29% | AYD80895.1     | Klebsiella phage KP179           |
| 17 | 31215-32018 | 59 | I | 267AA | 113 gène Product                                                                                      | 91% | 39.08% | AXN57777.1     | Acinetobacter phage ABPH49       |
| 18 | 32482-33861 | 61 | I | 459AA | DNA ligase D, ligase domain, ligD_61                                                                  | 98% | 71.65% | QUL77236.1     | Escherichia phage UPEC06         |
| 19 | 34623-35012 | 62 | I | 129AA | putative transposase-like protein                                                                     | 71% | 64.52% | QUL77240.1     | Escherichia phage UPEC06         |
| 20 | 35015-35251 | 63 | I | 78AA  | Queuosine biosynthesis protein QueD, queD_65                                                          | 98% | 58.97% | QEG12341.1     | Klebsiella phage vB_KaeM_KaOmega |
| 21 | 37233-38147 | 69 | I | 304AA | Ribose-phosphate di phosphokinase, prs_71                                                             | 95% | 49.15% | YP_009188960.1 | Cronobacter phage PBES 02        |

|    |               |     |     |       |                                                         |                |                      |                                  |                                                                   |
|----|---------------|-----|-----|-------|---------------------------------------------------------|----------------|----------------------|----------------------------------|-------------------------------------------------------------------|
| 22 | 38205-39995   | 70  | I   | 596AA | Putative nictotinate phospho-ribosyl-transferase        | 99%            | 75.84%               | YP_009188961.1<br>QEG12348.1     | Cronobacter phage PBES 02<br>Klebsiella phage<br>vB_KaeM_KaOmega  |
| 23 | 41529-41888   | 75  | I   | 119AA | HNH endonuclease [Bacillus velezensis]                  | 72%            | 59.77%               | QCW19103.1                       | Salmonella phage 7t3                                              |
| 24 | 48730-49797   | 83  | II  | 355AA | pyridine nucleotide-disulfide oxidoreductase            | 97%            | 64.62%<br>62.95%     | YP_007392673.1<br>ARB11480.1     | Pectobacterium phage phiTE<br>Pectobacterium phage<br>vB_PatM_CB7 |
| 25 | 58340-58801   | 95  | II  | 153AA | Putative RNA polymerase                                 | 99%            | 75.82%<br>75.16%     | ATS93412.1<br>YP_009014974.1     | Pectobacterium phage<br>DU_PP_I<br>Cronobacter phage CR9          |
| 26 | 88022-90040   | 132 | III | 672AA | hypothetical protein<br>(Putative serine protease)      | 99%            | 65.38%<br>65.33%     | YP_009015018.1<br>QQG33359.1     | Cronobacter phage CR9<br>Pectobacterium phage<br>PcCB7V           |
| 27 | 90351-90533   | 134 | III | 60AA  | hypothetical protein<br><br>putative RNA triphosphatase | 91%<br><br>57% | 83.93%<br><br>82.86% | YP_006383073.1<br><br>QQG33364.1 | Cronobacter phage CR3<br>Pectobacterium phage<br>PcCB7V           |
| 28 | 93236-94078   | 139 | III | 280AA | 19 gene product                                         | 99%            | 76.79%               | YP_004893825.1                   | Salmonella phage PVPSE1                                           |
| 29 | 95585-98212   | 142 | III | 875AA | DNA polymerase I, polA_143                              | 99%            | 82.37%               | YP_006383075.1                   | Cronobacter phage CR3                                             |
| 30 | 99161-99529   | 146 | III | 122AA | Restriction alleviation protein, La                     | 39%            | 51.02%               | YP_007392476.1                   | Pectobacterium phage phiTE                                        |
| 31 | 102081-104078 | 154 | III | 665AA | phage replicative helicase, DnaB family_155             | 98%            | 82.13%               | YP_009015046.1                   | Cronobacter phage CR9                                             |
| 32 | 104920-105174 | 159 | III | 84AA  | Cell division topological specificity factor Mi         | 95%            | 48.15%               | YP_009015051.1                   | Cronobacter phage CR9                                             |

|    |               |     |     |       |                                                                        |                  |                            |                                                 |                                                                                 |
|----|---------------|-----|-----|-------|------------------------------------------------------------------------|------------------|----------------------------|-------------------------------------------------|---------------------------------------------------------------------------------|
| 33 | 105587-106957 | 162 | III | 456AA | Ti-type conjugative transfer relaxase TraA, Tra (putative helicase)    | 99%<br>99%       | 70.61%<br>70.55%           | YP_009189062.1<br>YP_009042324.1                | Cronobacter phage PBES 02<br>Cronobacter phage CR8                              |
| 34 | 107343-107864 | 165 | III | 173AA | spore cortex-lytic enzyme, sleB_166<br>Cell wall hydrolase             | 98%<br>98<br>95% | 51.16%<br>51.15%<br>52.35% | YP_009187858.1<br>YP_006383102.1<br>QXL90429.1% | Klebsiella phage vB_KpnM_KB57<br>Cronobacter phage CR3<br>Salmonella phage NINP |
| 35 | 107925-109334 | 166 | III | 469AA | (Role:166): RNA ligase, Rnl2 family_167                                | 73%              | 50.43%                     | YP_009187854.1                                  | Klebsiella phage vB_KpnM_KB57                                                   |
| 36 | 109327-109833 | 167 | III | 168AA | Putative phosphatase putative hydrolase                                | 98%<br>98%       | 64.46%<br>66.27%           | YP_006383104.1<br>QEG12165.1                    | Cronobacter phage CR3<br>Klebsiella phage vB_KaeM_KaOmega                       |
| 37 | 110701-111144 | 172 | III | 147AA | Phosphonate metabolism protein                                         | 97%              | 77.08%                     | YP_009015065.1                                  | Cronobacter phage CR9                                                           |
| 38 | 115193-116101 | 183 | III | 302AA | 218 gene product                                                       | 93%              | 38.33%                     | YP_004894025.1                                  | Salmonella phage PVPSE1                                                         |
| 39 | 116792-117349 | 185 | III | 185AA | RelA/SpoT family protein_186 putative metal dependent phosphohydrolase | 95%<br>98%       | 66.85%<br>64.86%           | QEG12186.1<br>YP_009015084.1                    | Klebsiella phage vB_KaeM_KaOmega<br>Cronobacter phage CR9                       |
| 40 | 119198-120418 | 191 | III | 406AA | Hypothetical protein Ribosomal protein uS19, rpsS_192                  | 98%              | 62.1%                      | YP_009015088.1                                  | Cronobacter phage CR9                                                           |
| 41 | 120492-122060 | 192 | III | 522AA | Hypothetical protein<br>Putative ATPase                                | 98%<br>98%       | 62.13%<br>61.76%           | YP_009015088.1<br>QEG12191.1                    | Cronobacter phage CR9<br>Klebsiella phage vB_KaeM_KaOmega                       |

---

|    |                   |     |    |       |                        |     |        |            |                  |
|----|-------------------|-----|----|-------|------------------------|-----|--------|------------|------------------|
| 42 | 130673-<br>131035 | 215 | IV | 120AA | SH3 domain protein_218 | 84% | 52.43% | QHJ84486.1 | Siphoviridae sp. |
|----|-------------------|-----|----|-------|------------------------|-----|--------|------------|------------------|

---
